# Supplementary material for: Prostaglandin E2 stimulates COX-2 expression via mitogen-activated protein kinase p38 but not ERK in human follicular dendritic cell-like cells
Source: Springer Nature journal article supplement (doi:10.1186/s12865-020-00347-y), 2020-04-17

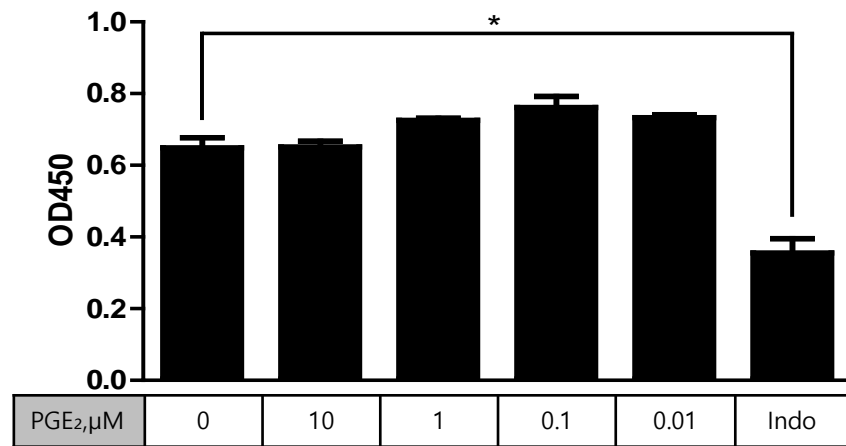

Supplement: MOESM1 [file 17905370]
